# Supplementary material
Source: bioRxiv or medRxiv preprint supplement (https://medrxiv.org/content/medrxiv/early/2024/03/02/2024.03.01.24303602/DC1/embed/media-1.pdf)
Supplement: Supplementary file [file media-1.pdf]

# Supporting information: Full waning model equations and initialization

## Local SECIRS-type model with waning immunity

In order to present the complete model equations, we define the most important parameters again. For more details, we refer to the subsection *A multi-layer waning immunity model of SECIRS-type*.

For the sake of simplicity, we drop the spatial-dependency superindex  $*(k)$ . Let  $\mu_{z_j,i}^{z_{j+1},i}$  be the probability of transition from disease compartment  $z_{j,i}$  to the worsened state  $z_{j+1,i}$ . Then,  $1 - \mu_{z_j,i}^{z_{j+1},i}$  is the probability to recover from disease state  $z_{j,i}$ . Let further  $T_{z_j,i}$  be the time in days an individual stays in a compartment  $z_{j,i}$ . Additionally, we define  $N_i^{D^\perp}$  as people from age group  $i$  which are not in the dead compartment.

Therefore, the systems of equations is given by

$$\begin{aligned} \frac{dS_{N,i}}{dt} &= -S_{N,i}\rho_{N,i} \sum_{j=1}^n \phi_{i,j} \\ &\quad \frac{\xi_{I_{NS},j}(I_{NS,N,j} + I_{NS,PI,j} + I_{NS,II,j}) + \xi_{I_{Sy},j}(I_{Sy,N,j} + I_{Sy,PI,j} + I_{Sy,II,j})}{N_j^{D^\perp}} \\ &\quad - v_{N,i}S_{N,i} + \frac{1}{T_{WPI}}S_{PI,i}, \end{aligned} \quad (1)$$

$$\begin{aligned} \frac{dE_{N,i}}{dt} &= S_{N,i}\rho_{N,i} \sum_{j=1}^n \phi_{i,j} \\ &\quad \frac{\xi_{I_{NS},j}(I_{NS,N,j} + I_{NS,PI,j} + I_{NS,II,j}) + \xi_{I_{Sy},j}(I_{Sy,N,j} + I_{Sy,PI,j} + I_{Sy,II,j})}{N_j^{D^\perp}} \\ &\quad - \frac{E_{N,i}}{T_{E_i}}, \end{aligned} \quad (2)$$

$$\frac{dI_{NS,N,i}}{dt} = \frac{E_{N,i}}{T_{E_i}} - \frac{I_{NS,N,i}}{T_{I_{NS},i}}, \quad (3)$$

$$\frac{dI_{NS,N,C,i}}{dt} = -\frac{I_{NS,N,C,i}}{T_{I_{NS},i}}, \quad (4)$$

$$\frac{dI_{Sy,N,i}}{dt} = \frac{\mu_{I_{NS},i}^{I_{Sy},N,i}}{T_{I_{NS},i}} I_{NS,N,i} - \frac{I_{Sy,N,i}}{T_{I_{Sy},i}}, \quad (5)$$

$$\frac{dI_{Sy,N,C,i}}{dt} = \frac{\mu_{I_{NS},i}^{I_{Sy},N,i}}{T_{I_{NS},i}} I_{NS,N,C,i} - \frac{I_{Sy,N,C,i}}{T_{I_{Sy},i}}, \quad (6)$$

$$\frac{dI_{Sev,N,i}}{dt} = \frac{\mu_{I_{Sy},i}^{I_{Sev},N,i}}{T_{I_{Sy},i}} (I_{Sy,N,i} + I_{Sy,N,C,i}) - \frac{I_{Sev,N,i}}{T_{I_{Sev},i}}, \quad (7)$$

$$\frac{dI_{Cr,N,i}}{dt} = \frac{\mu_{I_{Sev},i}^{I_{Cr},N,i}}{T_{I_{Sev},i}} I_{Sev,N,i} - \frac{I_{Cr,N,i}}{T_{I_{Cr},i}}, \quad (8)$$

$$\frac{dD_{N,i}}{dt} = \frac{\mu_{I_{Cr},i}^{D_{N,i}}}{T_{I_{Cr},i}} I_{Cr,N,i}, \quad (9)$$

$$\begin{aligned} \frac{dS_{PI,i}}{dt} &= -S_{PI,i}\rho_{PI,i} \sum_{j=1}^n \phi_{i,j} \\ &\quad \frac{\xi_{I_{NS},j}(I_{NS,N,j} + I_{NS,PI,j} + I_{NS,II,j}) + \xi_{I_{Sy},j}(I_{Sy,N,j} + I_{Sy,PI,j} + I_{Sy,II,j})}{N_j^{D^\perp}} \\ &\quad - v_{PI,i}S_{PI,i} + \frac{1}{T_{\mathcal{T}PI,i}}\mathcal{T}_{PI,i} - \frac{1}{T_{WPI}}S_{PI,i} + \frac{1}{T_{WII}}S_{II,i}, \end{aligned} \quad (10)$$

$$\begin{aligned} \frac{dE_{PI,i}}{dt} &= S_{PI,i} \rho_{PI,i} \sum_{j=1}^n \phi_{i,j} \\ &\quad \frac{\xi_{INS,j} (INS,N,j + INS,PI,j + INS,II,j) + \xi_{ISy,j} (ISy,N,j + ISy,PI,j + ISy,II,j)}{N_j^{D^\perp}} \\ &\quad - \frac{E_{PI,i}}{T_{E_i}}, \end{aligned} \quad (11)$$

$$\frac{dI_{NS,PI,i}}{dt} = \frac{E_{PI,i}}{T_{E_i}} - \frac{I_{NS,PI,i}}{\kappa T_{INS,i}}, \quad (12)$$

$$\frac{dI_{NS,PI,C,i}}{dt} = -\frac{I_{NS,PI,C,i}}{\kappa T_{INS,i}}, \quad (13)$$

$$\frac{dI_{S_y,PI,i}}{dt} = \frac{\mu_{INS,PI,i}^{I_{S_y,PI,i}}}{\kappa T_{INS,i}} I_{NS,PI,i} - \frac{I_{S_y,PI,i}}{\kappa T_{ISy,i}}, \quad (14)$$

$$\frac{dI_{S_y,PI,C,i}}{dt} = \frac{\mu_{INS,PI,i}^{I_{S_y,PI,i}}}{\kappa T_{INS,i}} I_{NS,PI,C,i} - \frac{I_{S_y,PI,C,i}}{\kappa T_{ISy,i}}, \quad (15)$$

$$\frac{dI_{Sev,PI,i}}{dt} = \frac{\mu_{ISy,PI,i}^{I_{Sev,PI,i}}}{\kappa T_{ISy,i}} (I_{S_y,PI,i} + I_{S_y,PI,C,i}) - \frac{I_{Sev,PI,i}}{T_{I_{Sev,i}}}, \quad (16)$$

$$\frac{dI_{Cr,PI,i}}{dt} = \frac{\mu_{I_{Sev,PI,i}}^{I_{Cr,PI,i}}}{T_{I_{Sev,i}}} I_{Sev,PI,i} - \frac{I_{Cr,PI,i}}{T_{I_{Cr,i}}}, \quad (17)$$

$$\frac{dD_{PI,i}}{dt} = \frac{\mu_{I_{Cr,PI,i}}^{D_{PI,i}}}{T_{I_{Cr,i}}} I_{Cr,PI,i}, \quad (18)$$

$$\begin{aligned} \frac{dS_{II,i}}{dt} &= -S_{II,i} \rho_{II,i} \sum_{j=1}^n \phi_{i,j} \\ &\quad \frac{\xi_{INS,j} (INS,N,j + INS,PI,j + INS,II,j) + \xi_{ISy,j} (ISy,N,j + ISy,PI,j + ISy,II,j)}{N_j^{D^\perp}} \\ &\quad - v_{II,i} S_{II,i} - \frac{1}{T_{W_{II}}} S_{II,i}, \end{aligned} \quad (19)$$

$$\begin{aligned} \frac{dE_{II,i}}{dt} &= S_{II,i} \rho_{II,i} \sum_{j=1}^n \phi_{i,j} \\ &\quad \frac{\xi_{INS,j} (INS,N,j + INS,PI,j + INS,II,j) + \xi_{ISy,j} (ISy,N,j + ISy,PI,j + ISy,II,j)}{N_j^{D^\perp}} \\ &\quad - \frac{E_{II,i}}{T_{E_i}}, \end{aligned} \quad (20)$$

$$\frac{dI_{NS,II,i}}{dt} = \frac{E_{II,i}}{T_{E_i}} - \frac{I_{NS,II,i}}{\kappa T_{INS,i}}, \quad (21)$$

$$\frac{dI_{NS,II,C,i}}{dt} = -\frac{I_{NS,II,C,i}}{\kappa T_{INS,i}}, \quad (22)$$

$$\frac{dI_{S_y,II,i}}{dt} = \frac{\mu_{INS,II,i}^{I_{S_y,II,i}}}{\kappa T_{INS,i}} I_{NS,II,i} - \frac{I_{S_y,II,i}}{\kappa T_{ISy,i}}, \quad (23)$$

$$\frac{dI_{S_y,II,C,i}}{dt} = \frac{\mu_{INS,II,i}^{I_{S_y,II,i}}}{\kappa T_{INS,i}} I_{NS,II,C,i} - \frac{I_{S_y,II,C,i}}{\kappa T_{ISy,i}}, \quad (24)$$

$$\frac{dI_{Sev,II,i}}{dt} = \frac{\mu_{I_{Sy,II,i}}^{I_{Sev,II,i}}}{\kappa T_{I_{Sy,i}}} \left( I_{Sy,II,i} + I_{Sy,II,C,i} \right) - \frac{I_{Sev,II,i}}{T_{I_{Sev,i}}}, \quad (25)$$

$$\frac{dI_{Cr,II,i}}{dt} = \frac{\mu_{I_{Sev,II,i}}^{I_{Cr,II,i}}}{T_{I_{Sev,i}}} I_{Sev,II,i} - \frac{I_{Cr,II,i}}{T_{I_{Cr,i}}}, \quad (26)$$

$$\frac{dD_{II,i}}{dt} = \frac{\mu_{I_{Cr,II,i}}^{D_{II,i}}}{T_{I_{Cr,i}}} I_{Cr,II,i}, \quad (27)$$

$$\begin{aligned} \frac{dT_{PI,i}}{dt} = & -\frac{1}{T_{T_{PI,i}}} T_{PI,i} + \frac{\mu_{I_{NS,N,i}}^{T_{PI,i}}}{T_{I_{NS,i}}} (I_{NS,N,i} + I_{NS,N,C,i}) \\ & + \frac{1 - \mu_{I_{Sy,N,i}}^{I_{Sev,N,i}}}{T_{I_{Sy,i}}} (I_{Sy,N,i} + I_{Sy,N,C,i}) \\ & + \frac{1 - \mu_{I_{Sev,N,i}}^{I_{Cr,N,i}}}{T_{I_{Sev,i}}} I_{Sev,N,i} + \frac{1 - \mu_{I_{Cr,N,i}}^{D_{N,i}}}{T_{I_{Cr,i}}} I_{Cr,N,i} + v_{N,i} S_{N,i}, \end{aligned} \quad (28)$$

$$\begin{aligned} \frac{dT_{II,i}}{dt} = & -\frac{1}{T_{T_{II,i}}} T_{II,i} + \frac{1 - \mu_{I_{NS,PI,i}}^{I_{Sy,II,i}}}{\kappa T_{I_{NS,i}}} (I_{NS,PI,i} + I_{NS,PI,C,i}) \\ & + \frac{1 - \mu_{I_{Sy,PI,i}}^{I_{Sev,PI,i}}}{\kappa T_{I_{Sy,i}}} (I_{Sy,PI,i} + I_{Sy,PI,C,i}) \\ & + \frac{1 - \mu_{I_{Sev,PI,i}}^{I_{Cr,PI,i}}}{T_{I_{Sev,i}}} I_{Sev,PI,i} + \frac{1 - \mu_{I_{Cr,PI,i}}^{D_{PI,i}}}{T_{I_{Cr,i}}} I_{Cr,PI,i} \\ & + \frac{1 - \mu_{I_{NS,II,i}}^{I_{Sy,II,i}}}{\kappa T_{I_{NS,i}}} (I_{NS,II,i} + I_{NS,II,C,i}) + \frac{1 - \mu_{I_{Sy,II,i}}^{I_{Sev,II,i}}}{\kappa T_{I_{Sy,i}}} (I_{Sy,II,i} + I_{Sy,II,C,i}) \\ & + \frac{1 - \mu_{I_{Sev,II,i}}^{I_{Cr,II,i}}}{T_{I_{Sev,i}}} I_{Sev,II,i} + \frac{1 - \mu_{I_{Cr,II,i}}^{D_{II,i}}}{T_{I_{Cr,i}}} I_{Cr,II,i} + v_{PI,i} S_{PI,i} + v_{II,i} S_{II,i}. \end{aligned} \quad (29)$$

An explanation of all used parameters for defining the model in Equations (1) - (29) is provided in Table 1.

### Initialization of the introduced compartmental models.

For simplicity, we explain our approach for one age group. It naturally transfers to all other age groups. To determine the initial states for the individual compartments of our model, we use the German case numbers published by the Robert Koch-Institute [2]. Note that any other reporting on the considered geography could be used. In our use case, we perform the initialization on county level. The following descriptions is however possible for any granularity, assuming that the data is available at this level. The initial idea for our approach to use the reported case data as initial states for each compartment was given in [3]. We state that the use of time spans or rates depending on the start **and** target compartment, e.g.,  $T_C^I$  and  $T_C^R$  may have the unwanted effect that  $\mu_C^R$  no longer represents a probability, as initially assumed and modeled. We thus reduce the description to using  $T_C = T_C^I = T_C^R$  and present this approach with additional adjustments to our model.

The idea behind the procedure is to extrapolate the reported numbers of cases only from the model stay times and transition probabilities. We refer to the number of cases (in the particular age group) as  $\sum^C(t)$ . Similarly, the number of deaths reported (in the particular age group) will be denoted  $\sum^D(t)$ . Furthermore, we use the accumulated number of partial, full and booster vaccinations (in the particular age group) up to day  $t$  [4]. We assign the three different types of vaccination to our immunity layers by referring them to as  $\sum^{V_{YN}}(t)$  (partial vaccinations),  $\sum^{V_{YPI}}(t)$  (full vaccinations) and  $\sum^{V_{YII}}(t)$  (booster vaccinations).

Following [3], we make the assumption that the number of confirmed cases is proportional to the number of symptomatic cases. Assuming a nontrivial but constant underdetection factor for the initialization phase, we define a factor  $\theta$  accounting for the estimated dark figure. The estimated number of reported and unreported symptomatic

Table 1: **Parameters used in Eq (1) - (29).**

| Parameter         | Description                                                                                                                                                                     |
|-------------------|---------------------------------------------------------------------------------------------------------------------------------------------------------------------------------|
| $\phi_{i,j}$      | Daily contact rate between two age groups $i$ and $j$ .                                                                                                                         |
| $\rho_i$          | Transmission risk for people located in one of the susceptible compartments depending on immunity layer ( $\rho_i, \rho_{PI,i}, \rho_{II,i}$ ) and seasonality factor; see [1]. |
| $N_i^{D^\perp}$   | People from age group $i$ which have not died during simulation.                                                                                                                |
| $\mu_{z_1}^{z_2}$ | Probability of transition from compartment $z_1$ to $z_2$ .                                                                                                                     |
| $T_{z_1}$         | Time in days an individual stays in a compartment $z_1$ .                                                                                                                       |
| $\xi_{I_{NS},i}$  | Proportion of asymptomatic infectious people who are not isolated.                                                                                                              |
| $\xi_{I_{Sy},i}$  | Proportion of symptomatic infectious people who are not isolated.                                                                                                               |
| $\kappa$          | Reduction factor for time spans of asymptomatic and symptomatic infections of individuals with partial or improved immunity.                                                    |
| $pI_{Sy,PI}$      | Effectiveness of partial immunity protection against symptomatic infection.                                                                                                     |
| $pI_{Sev,PI}$     | Effectiveness of partial immunity protection against hospitalization.                                                                                                           |
| $pI_{Cr,PI}$      | Effectiveness of partial immunity protection against ICU treatment.                                                                                                             |
| $pD_{PI}$         | Effectiveness of partial immunity protection against death.                                                                                                                     |
| $pI_{Sy,II}$      | Effectiveness of improved immunity protection against symptomatic infection.                                                                                                    |
| $pI_{Sev,II}$     | Effectiveness of improved immunity protection against hospitalization.                                                                                                          |
| $pI_{Cr,II}$      | Effectiveness of improved immunity protection against ICU treatment.                                                                                                            |
| $pD_{II}$         | Effectiveness of improved immunity protection against death.                                                                                                                    |
| $T_{W_{PI}}$      | Rate of waning immunity of susceptible who are located in the partial immunity state.                                                                                           |
| $T_{W_{II}}$      | Rate of waning immunity of susceptible who are located in the improved immunity state.                                                                                          |
| $v_N$             | Vaccination rate of people with naive immunity.                                                                                                                                 |
| $v_{PI}$          | Vaccination rate of susceptible with partial immunity.                                                                                                                          |
| $v_{II}$          | Vaccination rate of people with improved immunity.                                                                                                                              |

infections on day  $t$  is then given by

$$\widehat{\Sigma}^C(t) = \theta \Sigma^C(t). \quad (30)$$

Furthermore, for simplicity, we assume that detection (or, more general, inclusion into  $\widehat{\Sigma}^C(t)$ ) happens at the time of developing systems. In a generalized approach, an additional shift  $\widehat{\Sigma}^C(t + \delta_T)$ , with  $\delta_T > 0$  a testing or reporting delay, could be added.

As already mentioned in the introduction of the model, we divide the population into three different immunity levels. In [5], an age-resolved breakdown of the German population into four different immunity levels is given. In this study exposure to the virus is defined as a survived infection or vaccination with a corresponding immune response. The classification in four groups is based on the degree of exposure: people with no confirmed exposures, people with one or two confirmed exposures, people with exactly three confirmed exposures and those surpassing three confirmed exposures. Since the proportion of individuals with zero confirmed exposures to date is extremely small, we aggregate them with the group of one or two exposures. Thus, the division takes place into a group  $N_N$  with zero, one or two exposures, a group  $N_{PI}$  with exactly three exposures, and a group  $N_{II}$  with more than three exposures. From the results of [5], we can estimate the immunity of the total population at hand. Next, we explain how we use the reported numbers to estimate the distribution of the population inside the immunity layers.

To determine the initial state of individuals in the exposed state as shown, we proceed as visualized in Fig. 1. Based on our defined transition times, individuals that get exposed at  $t_0$  develop symptoms at  $t_0 + T_E + T_{I_{NS}}$  (on average) – and would have been reported or, more generally, included in  $\widehat{\Sigma}^C(t_0 + T_E + T_{I_{NS}})$ . Individuals who are still exposed at  $t_0$  but become pre- or asymptomatic shortly after that, either develop symptoms by time  $t_0 + T_{I_{NS}}$  or will have recovered by then (i.e., will have been included in  $\widehat{\Sigma}^C(t_0 + T_{I_{NS}})$ ). Thus, the total number of exposed at  $t_0$  computes as

$$\sum_{m=1}^3 E_{Y_m}(t_0) = \left( \frac{1}{\mu_{I_{NS}, Y_m}^{I_{Sy}, Y_m}} (\widehat{\Sigma}^C(t_0 + T_E + T_{I_{NS}}) - \widehat{\Sigma}^C(t_0 + T_{I_{NS}})) \right). \quad (31)$$

Here, we have added the denominator  $\mu_{I_{NS}, Y_m}^{I_{Sy}, Y_m}$  to account for asymptomatic individuals that recover without ever developing symptoms.

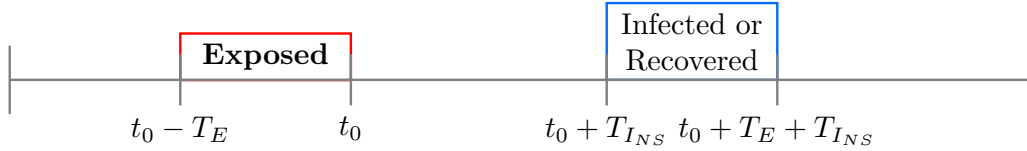

Fig 1: **Initialization of the Exposed compartment.** For an arbitrary but fixed  $t_0$ , individuals who got exposed in the left shaded area (red) will get symptoms or recover in the right shaded area (blue).

We determine the initial number of exposed individuals for any immunity layer  $Y_m$  by a uniform distribution to the three immunity layers, i.e.,

$$E_{Y_m}(t_0) = \frac{N_{Y_m}(t_0)}{\sum_{j=1}^3 N_{Y_j}(t_0)} \left( \frac{1}{\mu_{I_{NS}, Y_m}^{I_{Sy}, Y_m}} (\widehat{\Sigma}^C(t_0 + T_E + T_{I_{NS}}) - \widehat{\Sigma}^C(t_0 + T_{I_{NS}})) \right). \quad (32)$$

We can adapt this scheme to all other compartments. Therefore, the other equations are given by

$$\begin{aligned} I_{NS, Y_m}(t_0) &= \frac{N_{Y_m}(t_0)}{\sum_{j=1}^3 N_{Y_j}(t_0)} \left( \frac{1}{\mu_{I_{NS}, Y_m}^{I_{Sy}, Y_m}} (\widehat{\Sigma}^C(t_0 + T_{I_{NS}}) - \widehat{\Sigma}^C(t_0)) \right), \\ I_{Sy, Y_m}(t_0) &= \frac{N_{Y_m}(t_0) p_{I_{Sy}, Y_m}}{\sum_{j=1}^3 N_{Y_j}(t_0) p_{I_{Sy}, Y_j}} \left( \widehat{\Sigma}^C(t_0) - \widehat{\Sigma}^C(t_0 - T_{I_{Sy}}) \right), \\ I_{Sev, Y_m}(t_0) &= \frac{N_{Y_m}(t_0) p_{I_{Sev}, Y_m}}{\sum_{j=1}^3 N_{Y_j}(t_0) p_{I_{Sev}, Y_j}} \left( \mu_{I_{Sy}, Y_N}^{I_{Sev}, Y_N} (\widehat{\Sigma}^C(t_0 - T_{I_{Sy}}) - \widehat{\Sigma}^C(t_0 - T_{I_{Sy}} - T_{I_{Sev}})) \right). \end{aligned} \quad (33)$$

Note that for symptomatic and subsequent infection states, we use a nonuniform distribution, taking into account the effectiveness of protection of the different immunity layers against severe courses of the disease. The group  $I_{Cr, Y_m}(t_0)$  is intentionally left out here, as it is initialized directly with daily ICU reports from [6].

To calculate the total deaths per immunity layer, it is essential to track the complete historical data on layer sizes and fatalities. In our model, however, we only model the deaths during the simulation phase and initialize

$$D_{Y_m}(t_0) = 0. \quad (34)$$

Previous death numbers have to be added to the simulation result in post-processing to see the overall number of deaths.

Finally, we need to determine the number of individuals in the temporary immunity and the susceptible compartments at  $t_0$ . In order to calculate the number of temporarily immune people, we need to estimate the

number of recently recovered  $R_{Y_m}^R(t) := \frac{N_{Y_m}(t_0)}{\sum_{j=2}^3 N_{Y_j}(t_0)} \left( \widehat{\Sigma}^C(t) - \widehat{\Sigma}^C(t - T_{\mathcal{I}_{Y_m}}) \right)$ ,  $Y_m \in \{PI, II\}$  and recently vaccinated  $R_{Y_m}^V := \widehat{\Sigma}^{V_{Y_m}}(t) - \widehat{\Sigma}^{V_{Y_m}}(t - T_{\mathcal{I}_{Y_m}})$  individuals within the last  $T_{\mathcal{I}_{Y_m}}$  days,  $Y_m \in \{PI, II\}$ , such that

$$\mathcal{I}_{Y_m}(t) = \min \left\{ N_{Y_m}, \max \left\{ 0, R_{Y_m}^V + R_{Y_m}^R(t) - \sum_m \left( I_{Sy, Y_m}(t) + I_{Sev, Y_m}(t) + I_{Cr, Y_m}(t) \right) \right\} \right\}, \quad (35)$$

$$(36)$$

The number of individuals in the susceptible compartment results directly from the remaining population in each layer that has not yet been taken into account in the other compartments.

## References

1. Kühn MJ, Abele D, Mitra T, Koslow W, Abedi M, Rack K, et al. Assessment of effective mitigation and prediction of the spread of SARS-CoV-2 in Germany using demographic information and spatial resolution. *Mathematical Biosciences*. 2021; p. 108648. doi:<https://doi.org/10.1016/j.mbs.2021.108648>.
2. Robert Koch-Institut. SARS-CoV-2 Infektionen in Deutschland; 2023. Zenodo. Available from: <https://doi.org/10.5281/zenodo.7814948>.
3. Koslow W, Kühn MJ, Binder S, Klitz M, Abele D, Basermann A, et al. Appropriate relaxation of non-pharmaceutical interventions minimizes the risk of a resurgence in SARS-CoV-2 infections in spite of the Delta variant. *PLOS Computational Biology*. 2022;18(5):e1010054. doi:10.1371/journal.pcbi.1010054.
4. Digitales Impfquotenmonitoring zur COVID-19-Impfung; 2023. Available from: [https://www.rki.de/DE/Content/InfAZ/N/Neuartiges\\_Coronavirus/Daten/Impfquoten-Tab.html](https://www.rki.de/DE/Content/InfAZ/N/Neuartiges_Coronavirus/Daten/Impfquoten-Tab.html).
5. Lange B, Jäger VK, Rücker V, Harries M, Hassenstein MJ, Dreier M, et al.. 2. Interimsanalyse des IMMUNEBRIDGE-Projektes zur Kommunikation von vorläufigen Ergebnissen an das Modellierungsnetz für schwere Infektionskrankheiten; 2022. Available from: <https://doi.org/10.5281/zenodo.7177592>.
6. Deutsche Interdisziplinäre Vereinigung für Intensiv- und Notfallmedizin (DIVI). DIVI Intensivregister Tagesreport; 2022. Available from: <https://www.divi.de/divi-intensivregister-tagesreport-archiv>.
